# Supplementary material for: Design and synthesis of hollow NiCo2O4 nanoboxes as anodes for lithium-ion and sodium-ion batteries
Source: Royal Society of Chemistry journal article supplement (doi:10.1039/c6cp02871c), 2016-01-01
Supplement: c6cp02871c1.pdf [file c6cp02871c1.pdf]

## Design and synthesis of hollow $\text{NiCo}_2\text{O}_4$ nanoboxes as anodes for lithium-ion and sodium-ion batteries

Junfen Chen<sup>a,b,c,d</sup>, Qiang Ru<sup>a,b,c,d\*</sup>, Yudi Mo<sup>a,b,c,d</sup>, Shejun Hu<sup>a,b,c,d</sup> and Xianhua Hou<sup>a,b,c,d</sup>

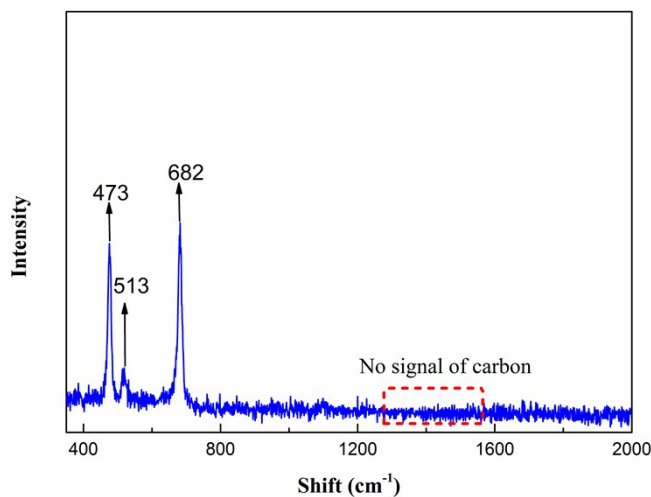

**Fig. S1** Raman spectra of the NCO-NBs.

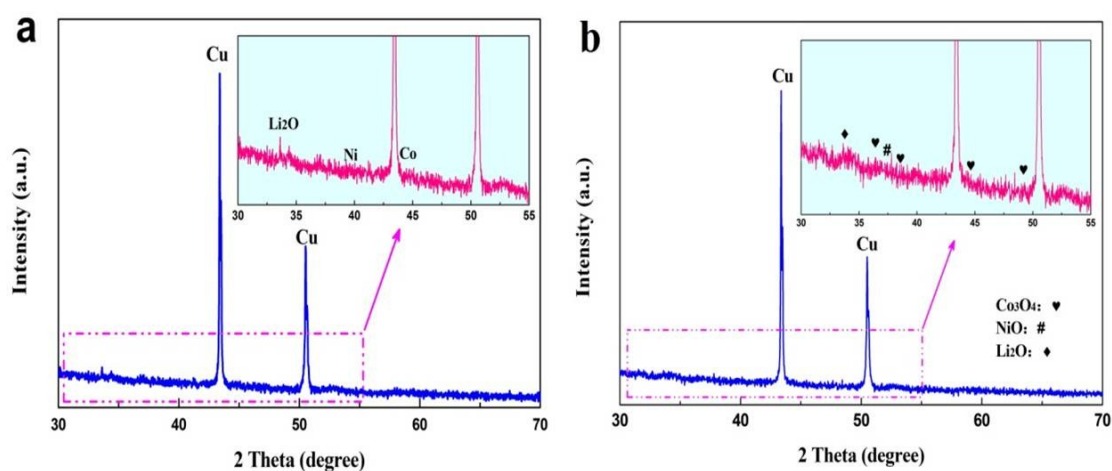

**Fig. S2** XRD pattern of (a) the discharged NCO-NBs electrode and (b) the recharged NCO-NBs electrode after the 150th cycle.

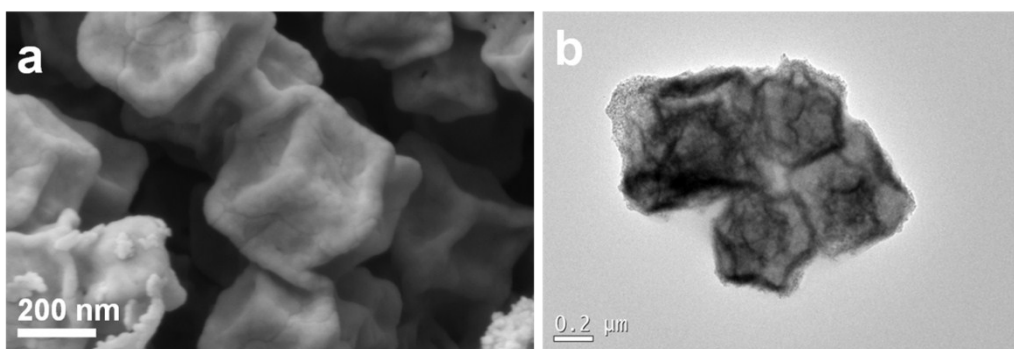

**Fig. S3** (a) SEM and (b) TEM images of the  $\text{Co}_3\text{O}_4$ -NBs.

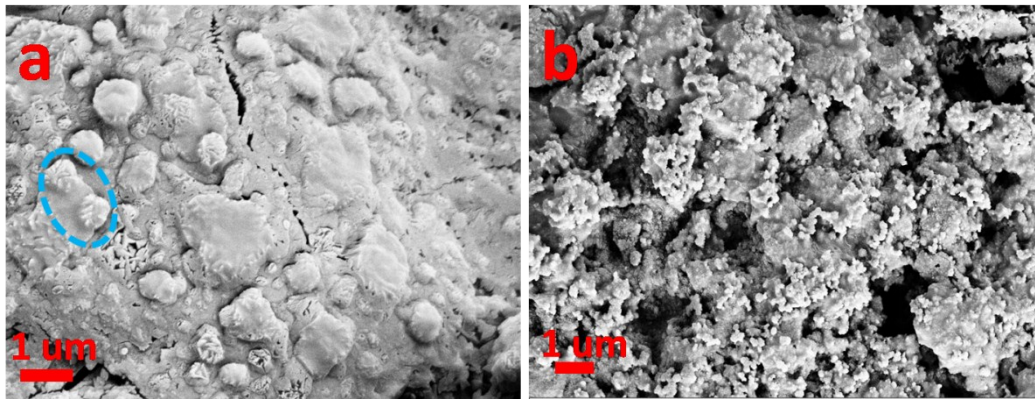

**Fig. S4** SEM images of (a) NCO-NBs and (b) Co<sub>3</sub>O<sub>4</sub>-NBs electrode after 150 cycles at a current density of 500 mA g<sup>-1</sup>.
